# Supplementary material
Source: PubMed Central journal article supplement (PMC10870833)
Supplement: NIHMS1954269-supplement-fig_s1.pdf [file NIHMS1954269-supplement-fig_s1.pdf]

**Figure S1.** Skewed distribution of CAC scores in the Project Baseline Health Study cohort with a maximal value of 8381.

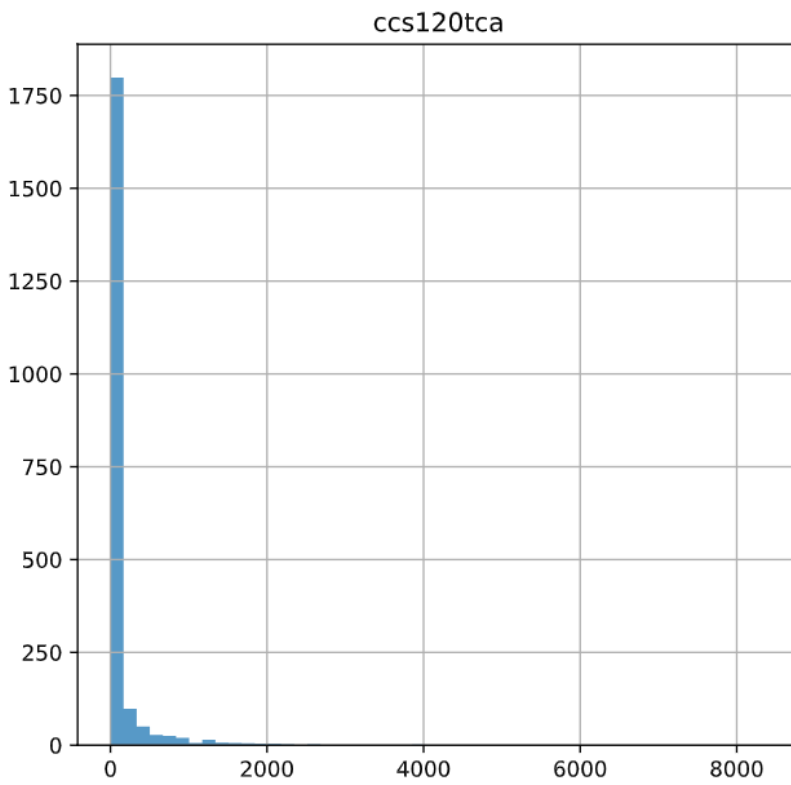

CAC, coronary artery calcium
