# Supplementary material
Source: PubMed Central journal article supplement (PMC10870833)
Supplement: NIHMS1954269-supplement-fig_s2.pdf [file NIHMS1954269-supplement-fig_s2.pdf]

**Figure S2.** Age-specific percentiles of diastolic function indexes from 560 healthy references. The red line represents low-risk reference cut-offs for reference limits.

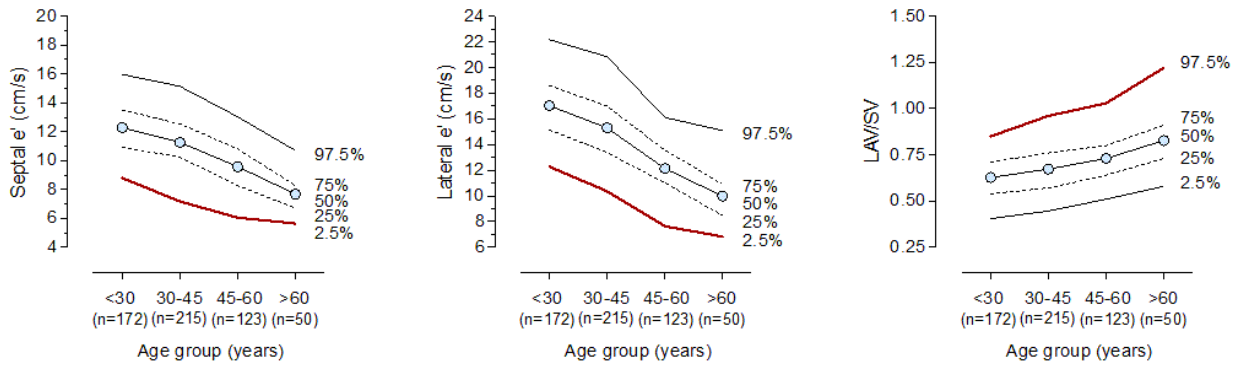

| Healthy reference cut-off | Age group          |                      |                      |                   |
|---------------------------|--------------------|----------------------|----------------------|-------------------|
|                           | <30 yrs<br>(n=172) | 30-45 yrs<br>(n=215) | 45-60 yrs<br>(n=123) | >60 yrs<br>(n=50) |
| <i>2.5th percentile</i>   |                    |                      |                      |                   |
| Septal e' (cm/s)          | 8.8                | 7.2                  | 6.0                  | 5.6               |
| Lateral e' (cm/s)         | 12.3               | 10.4                 | 7.6                  | 6.8               |
| <i>97.5th percentile</i>  |                    |                      |                      |                   |
| LA volume / SV            | 0.82               | 0.96                 | 0.97                 | 1.20              |

LAV, left atrial volume; SV, stroke volume.
