# Supplementary material
Source: PubMed Central journal article supplement (PMC10870833)
Supplement: NIHMS1954269-supplement-Suppl_Materials.pdf [file NIHMS1954269-supplement-Suppl_Materials.pdf]

## SUPPLEMENTAL MATERIAL

**Figure S1.** Skewed distribution of CAC scores in the Project Baseline Health Study cohort with a maximal value of 8381.

**Figure S2.** Age-specific percentiles of diastolic function indexes from 560 healthy references. The red line represents low-risk reference cut-offs for reference limits.

**Table S1.** Multivariable-adjusted association between LV diastolic function indexes and CAC score (0, 0-100, 100-300, and  $\geq 300$ ).

**Table S2.** Multivariable-adjusted association between echocardiographic indexes and CAC score (0 and tertiles).

**Table S3.** Prevalence of LV diastolic dysfunction in the Project Baseline Health Study as defined by low-risk reference limits.

**Table S4.** General characteristics of the study population by LV diastolic function status.

**Table S5.** Multivariable-adjusted risk for LV diastolic dysfunction (Project Baseline Health Study criteria) by CAC score (0 and tertiles).

**Table S6.** Multivariable-adjusted risk for LV diastolic dysfunction (Project Baseline Health Study criteria) by CAC score (0, 0-100, 100-300, and  $\geq 300$ ).

**Table S7.** Classification of LV diastolic dysfunction according to Project Baseline Health Study criteria and American Society of Echocardiography recommendations on diastolic dysfunction.

**Table S8.** Multivariable-adjusted risk for LV diastolic dysfunction (American Society of Echocardiography recommendations) by CAC score (0 and tertiles).

**Table S9.** Multivariable-adjusted risk for LV diastolic dysfunction (American Society of Echocardiography recommendations) by CAC score (0, 0-100, 100-300, and  $\geq 300$ ).

**Table S10.** Multivariable-adjusted association between LV diastolic function indexes and CAC score (0 and tertiles).

**Table S11.** Multivariable-adjusted risk for LV diastolic dysfunction (Project Baseline Health Study definition) by CAC score (0 and tertiles) among age groups. In individuals below 50 years of age, 105 (10.4%) and 31 (3.1%) presented with LVDD grade I and II, respectively. In individuals over 50 years of age, 128 (11.9%) and 290 (27.1%) presented with LVDD grade I and II, respectively.
