# Supplementary material
Source: PubMed Central journal article supplement (PMC10870833)
Supplement: NIHMS1954269-supplement-Table_s1.pdf [file NIHMS1954269-supplement-Table_s1.pdf]

**Table S1.** Multivariable-adjusted association between LV diastolic function indexes and CAC score (0, 0-100, 100-300, and  $\geq 300$ ).

| CAC group                       | E/A ratio            |         | Septal-lateral e' (cm/s) |         | Septal-lateral E/e' ratio |         | LAVI                 |         |
|---------------------------------|----------------------|---------|--------------------------|---------|---------------------------|---------|----------------------|---------|
|                                 | Effect size $\pm$ SE | P value | Effect size $\pm$ SE     | P value | Effect size $\pm$ SE      | P value | Effect size $\pm$ SE | P value |
| CAC = 0 (n=1251)                | <i>reference</i>     |         | <i>reference</i>         |         | <i>reference</i>          |         | <i>reference</i>     |         |
| CAC >0 and <100 (n=472)         | -0.028 $\pm$ 0.022   | 0.22    | -0.37 $\pm$ 0.10         | <0.001  | 0.31 $\pm$ 0.12           | 0.010   | -0.77 $\pm$ 0.40     | 0.054   |
| CAC $\geq$ 100 and <300 (n=199) | 0.039 $\pm$ 0.035    | 0.27    | -0.20 $\pm$ 0.16         | 0.23    | 0.36 $\pm$ 0.19           | 0.061   | 0.28 $\pm$ 0.63      | 0.66    |
| CAC $\geq$ 300 (n=160)          | -0.019 $\pm$ 0.036   | 0.60    | -0.57 $\pm$ 0.16         | <0.001  | 0.97 $\pm$ 0.19           | <0.001  | 0.32 $\pm$ 0.64      | 0.61    |

The subgrouping of individuals with CAC > 0 was based on CAC tertile limits. Effect sizes were adjusted for clinical correlates identified in stepwise linear regression (Table 2). CAC, coronary artery calcium; LAVI, left atrial volume index; SE, standard error.
