# Supplementary material
Source: PubMed Central journal article supplement (PMC10870833)
Supplement: NIHMS1954269-supplement-Table_s2.pdf [file NIHMS1954269-supplement-Table_s2.pdf]

**Table S2.** Multivariable-adjusted association between echocardiographic indexes and CAC score.

| CAC group                  | LV mass index (g/m <sup>2</sup> ) |         | RWT              |         | LAV/SV           |         |
|----------------------------|-----------------------------------|---------|------------------|---------|------------------|---------|
|                            | Effect size ± SE                  | P value | Effect size ± SE | P value | Effect size ± SE | P value |
| CAC = 0 (n=1251)           | <i>reference</i>                  |         | <i>reference</i> |         | <i>reference</i> |         |
| CAC >0 and ≤17.5 (n=277)   | 2.27±1.03                         | 0.028   | 0.0055±0.0050    | 0.26    | -0.003±0.011     | 0.78    |
| CAC >17.5 and ≤176 (n=277) | 2.08±1.14                         | 0.068   | 0.011±0.0053     | 0.032   | -0.016±0.012     | 0.17    |
| CAC >176 (n=277)           | 7.48±1.30                         | <0.0001 | 0.014±0.0061     | 0.020   | -0.023±0.03      | 0.087   |

| CAC group                  | Aortic root size (cm) |         | Aortic sinus diameter (cm) |         |
|----------------------------|-----------------------|---------|----------------------------|---------|
|                            | Effect size ± SE      | P value | Effect size ± SE           | P value |
| CAC = 0 (n=1251)           | <i>reference</i>      |         | <i>reference</i>           |         |
| CAC >0 and ≤17.5 (n=277)   | 0.020±0.020           | 0.32    | 0.022±0.022                | 0.31    |
| CAC >17.5 and ≤176 (n=277) | 0.0093±0.022          | 0.69    | 0.011±0.024                | 0.63    |
| CAC >176 (n=277)           | 0.061±0.026           | 0.017   | 0.036±0.027                | 0.19    |

Individuals with CAC > 0 were classified based on CAC tertile limits. Effect sizes were adjusted for clinical correlates identified in the stepwise linear regression. CAC, coronary artery calcium; LAV/SV, left atrial volume/stroke volume; LV, left ventricular; RWT, relative wall thickness; SE, standard error.
