# Supplementary material
Source: PubMed Central journal article supplement (PMC10870833)
Supplement: NIHMS1954269-supplement-table_s3.pdf [file NIHMS1954269-supplement-table_s3.pdf]

**Table S3.** Prevalence of LV diastolic dysfunction in the Project Baseline Health Study as defined by low-risk reference limits.

| Category                                   | n (%)        |
|--------------------------------------------|--------------|
| Normal LV diastolic function               |              |
| E/A, e' and E/e' normal                    | 1450 (69.6%) |
| Isolated high E/e'*                        | 78 (3.7%)    |
| Grade I: Impaired LV relaxation            | 233 (11.2%)  |
| Low E/A and/or low e', normal E/e'         |              |
| Grade II: Moderate LVDD                    | 321 (15.4%)  |
| High E/e' and low e'                       |              |
| High E/e' confirmed by $\geq 1$ :          |              |
| High LA volume**                           |              |
| LV remodeling***                           |              |
| TR velocity $>2.5$ m/s and RVSP $>30$ mmHg |              |

Low E/A and low e' were respectively defined as having an E/A and e' below age-specific 2.5 percentiles of the healthy reference group. High E/e' was E/e' above the 97.5 percentile of the entire healthy reference group.

\*Includes individuals with high E/e' but normal E/A, e', LA volume and RVSP and no LV remodeling.

\*\*Defined as LA volume index or LA volume to stroke volume ratio above the 97.5 percentile of the entire healthy reference group.

\*\*\*Defined as having LV concentric remodeling and/or LV hypertrophy.

RVSP, right ventricular systolic pressure; TR, tricuspid regurgitation.
