# Supplementary material
Source: PubMed Central journal article supplement (PMC10870833)
Supplement: NIHMS1954269-supplement-table_s4.pdf [file NIHMS1954269-supplement-table_s4.pdf]

**Table S4.** General characteristics of the study population by LV diastolic function status.

| <b>Characteristics</b>                   | <b>No LVDD<br/>(n=1528)</b> | <b>LVDD<br/>(n=554)</b> |
|------------------------------------------|-----------------------------|-------------------------|
| <i>General clinical data</i>             |                             |                         |
| Age, y                                   | 47.0±15.9                   | 60.5±15.8*              |
| Female, n (%)                            | 847 (55.4)                  | 331 (59.7)              |
| Body mass index, kg/m <sup>2</sup>       | 27.6±6.3                    | 30.6±7.1*               |
| Systolic BP, mm Hg                       | 120.0±14.3                  | 132.5±17.5*             |
| Diastolic BP, mm Hg                      | 74.7±9.4                    | 78.7±10.8*              |
| Heart rate, bpm                          | 66.3±10.9                   | 69.5±12.5*              |
| Race                                     |                             |                         |
| White, n (%)                             | 940 (61.5)                  | 363 (65.5)              |
| Black or African American, n (%)         | 241 (15.8)                  | 113 (10.4)              |
| Asian, n (%)                             | 174 (11.4)                  | 40 (7.2)                |
| Other, n (%)                             | 173 (11.3)                  | 38 (6.8)                |
| <i>Questionnaire and medical history</i> |                             |                         |
| Current smoker, n (%)                    | 212 (13.9)                  | 81 (14.6)               |
| Hypertension, n (%)                      | 420 (27.5)                  | 379 (68.4)**            |
| Antihypertensive treatment, n (%)        | 219 (14.3)                  | 222 (40.1)**            |
| Diabetes mellitus type 2, n (%)          | 133 (9.0)                   | 143 (26.7)**            |
| History of CHD, n (%)                    | 20 (1.3)                    | 40 (7.2)**              |
| <i>Biochemistry</i>                      |                             |                         |
| HbA1c, %                                 | 5.53±0.81                   | 6.05±1.25*              |
| Total cholesterol, mmol/L                | 4.79±0.97                   | 4.73±1.09               |
| HDL cholesterol, mmol/L                  | 1.55±0.50                   | 1.44±0.48*              |
| Triglycerides, mmol/L                    | 1.18 (0.62 to 2.94)         | 1.42 (0.82 to 3.39) *   |
| eGFR, ml/min/1.73 m <sup>2</sup>         | 89.9±18.9                   | 82.2±20.5*              |
| <i>Conventional echocardiography</i>     |                             |                         |
| LV mass index, g/m <sup>2</sup>          | 67.9±15.2                   | 75.9±20.4*              |
| Relative wall thickness                  | 0.36±0.07                   | 0.41±0.09*              |
| LV ejection fraction, %                  | 58.7±3.4                    | 58.8±5.4                |
| <i>LV diastolic function</i>             |                             |                         |
| E/A ratio                                | 1.39±0.47                   | 0.97±0.43*              |
| Septal-lateral e' peak, cm/s             | 11.3±2.8                    | 7.31±2.01*              |
| E/e' ratio                               | 7.1±1.7                     | 10.5±3.4*               |
| LA volume index, mL/m <sup>2</sup>       | 27.6±6.6                    | 29.1±9.5*               |
| <i>Coronary artery calcium</i>           |                             |                         |
| CAC score = 0, n (%)                     | 1049 (68.7)                 | 202 (36.5)**            |
| CAC score 0-100, n (%)                   | 304 (19.9)                  | 168 (30.3)              |
| CAC score 100-300, n (%)                 | 99 (6.5)                    | 61 (11.0)               |
| CAC score >300, n (%)                    | 76 (5.0)                    | 123 (22.2)              |

Values are mean±SD, number of subjects (%) or median (10 to 90 percentile). BP, blood pressure; CAC, coronary artery calcium; CHD, coronary heart disease; eGFR, estimated glomerular filtration rate; HbA1c, hemoglobin A1c; LA, left atrial; LV, left ventricular; LVDD, left ventricular diastolic dysfunction. LVDD included grade I and II dysfunction. \**P*<0.05 in independent T-test. \*\**P*<0.05 for contingency table in Pearson's chi-square test.
