# Supplementary material
Source: PubMed Central journal article supplement (PMC10870833)
Supplement: NIHMS1954269-supplement-table_s5.pdf [file NIHMS1954269-supplement-table_s5.pdf]

**Table S5.** Multivariable-adjusted risk for LV diastolic dysfunction (Project Baseline Health Study criteria) by CAC score (0 and tertiles).

| CAC group                          | LV diastolic dysfunction |         |                        |         |
|------------------------------------|--------------------------|---------|------------------------|---------|
|                                    | Grade II (n=321)         |         | Grade I and II (n=554) |         |
|                                    | Odds ratio (5-95% CI)    | P value | Odds ratio (5-95% CI)  | P value |
| <b>Unadjusted model</b>            |                          |         |                        |         |
| CAC = 0 (n=1251)                   | <i>reference</i>         |         | <i>reference</i>       |         |
| CAC >0 and ≤17.5<br>(n=277)        | 3.63 (2.53 to 5.22)      | <0.001  | 2.58 (1.93 to 3.46)    | <0.001  |
| CAC >17.5 and ≤176<br>(n=277)      | 4.21 (2.95 to 6.00)      | <0.001  | 3.07 (2.31 to 4.09)    | <0.001  |
| CAC >176 (n=277)                   | 9.45 (6.83 to 13.1)      | <0.001  | 6.79 (5.13 to 9.00)    | <0.001  |
| <b>Age- and sex-adjusted model</b> |                          |         |                        |         |
| CAC = 0 (n=1251)                   | <i>reference</i>         |         | <i>reference</i>       |         |
| CAC >0 and ≤17.5<br>(n=277)        | 2.66 (1.79 to 3.97)      | <0.001  | 2.10 (1.54 to 2.85)    | <0.001  |
| CAC >17.5 and ≤176<br>(n=277)      | 1.75 (1.17 to 2.61)      | 0.006   | 1.71 (1.23 to 2.37)    | <0.001  |
| CAC >176 (n=277)                   | 3.49 (2.32 to 5.22)      | <0.001  | 3.10 (2.19 to 4.40)    | <0.001  |
| <b>Fully adjusted model</b>        |                          |         |                        |         |
| CAC = 0 (n=1251)                   | <i>reference</i>         |         | <i>reference</i>       |         |
| CAC >0 and ≤17.5<br>(n=277)        | 2.25 (1.47 to 3.44)      | <0.001  | 1.64 (1.18 to 2.28)    | 0.003   |
| CAC >17.5 and ≤176<br>(n=277)      | 1.26 (0.81 to 1.94)      | 0.30    | 1.23 (0.86 to 1.76)    | 0.25    |
| CAC >176 (n=277)                   | 1.94 (1.23 to 3.04)      | 0.004   | 1.73 (1.17 to 2.55)    | 0.006   |

Individuals with CAC >0 were classified based on CAC tertile limits. The fully adjusted model included clinical correlates identified in a stepwise logistic regression. CAC, coronary artery calcium; LV, left ventricular.
