# Supplementary material
Source: PubMed Central journal article supplement (PMC10870833)
Supplement: NIHMS1954269-supplement-Table_s6.pdf [file NIHMS1954269-supplement-Table_s6.pdf]

**Table S6.** Multivariable-adjusted risk for LV diastolic dysfunction (Project Baseline Health Study criteria) by CAC score (0, 0-100, 100-300, and  $\geq 300$ ).

| CAC group                                 | LV diastolic dysfunction (BHS) |         |                        |         |
|-------------------------------------------|--------------------------------|---------|------------------------|---------|
|                                           | Grade II (n=321)               |         | Grade I and II (n=554) |         |
|                                           | Odds ratio (5-95% CI)          | P value | Odds ratio (5-95%CI)   | P value |
| <b><i>Unadjusted model</i></b>            |                                |         |                        |         |
| CAC = 0 (n=1251)                          | <i>reference</i>               |         | <i>reference</i>       |         |
| CAC >0 and <100 (n=472)                   | 3.92 (2.88 to 5.35)            | <0.001  | 2.87 (2.25 to 3.65)    | <0.001  |
| CAC $\geq 100$ and <300 (n=199)           | 5.31 (3.61 to 7.81)            | <0.001  | 3.70 (2.67 to 5.12)    | <0.001  |
| CAC $\geq 300$ (n=160)                    | 11.8 (8.09 to 17.1)            | <0.001  | 8.52 (6.03 to 12.0)    | <0.001  |
| <b><i>Age- and sex-adjusted model</i></b> |                                |         |                        |         |
| CAC = 0 (n=1251)                          | <i>reference</i>               |         | <i>reference</i>       |         |
| CAC >0 and <100 (n=472)                   | 2.28 (1.62 to 3.22)            | <0.001  | 2.01 (1.55 to 2.63)    | <0.001  |
| CAC $\geq 100$ and <300 (n=199)           | 2.08 (1.34 to 3.24)            | 0.002   | 1.87 (1.29 to 2.72)    | 0.001   |
| CAC $\geq 300$ (n=160)                    | 4.37 (2.77 to 6.91)            | <0.001  | 3.73 (2.48 to 5.62)    | <0.001  |
| <b><i>Fully adjusted model</i></b>        |                                |         |                        |         |
| CAC = 0 (n=1251)                          | <i>reference</i>               |         | <i>reference</i>       |         |
| CAC >0 and <100 (n=472)                   | 1.79 (1.24 to 2.59)            | 0.002   | 1.52 (1.14 to 2.02)    | 0.004   |
| CAC $\geq 100$ and <300 (n=199)           | 1.30 (0.80 to 2.10)            | 0.29    | 1.13 (0.75 to 1.70)    | 0.57    |
| CAC $\geq 300$ (n=160)                    | 2.38 (1.44 to 3.93)            | 0.001   | 2.06 (1.31 to 3.26)    | 0.002   |

The fully adjusted model included clinical correlates identified in stepwise logistic regression. CAC, coronary artery calcium; LV, left ventricular.
