# Supplementary material
Source: PubMed Central journal article supplement (PMC10870833)
Supplement: NIHMS1954269-supplement-Table_s7.pdf [file NIHMS1954269-supplement-Table_s7.pdf]

**Table S7.** Classification of LV diastolic dysfunction according to Project Baseline Health Study criteria and American Society of Echocardiography recommendations on diastolic dysfunction.

| LVDF (ASE)            | LVDF (PBHS)        |                         |                       |                        |
|-----------------------|--------------------|-------------------------|-----------------------|------------------------|
|                       | Normal<br>(n=1450) | Isolated E/e'<br>(n=78) | DD grade I<br>(n=233) | DD grade II<br>(n=321) |
| Normal (n=1683)       | 1305 (90.0%)       | 64 (82.1%)              | 172 (73.8%)           | 142 (44.2%)            |
| Indeterminate (n=147) | 60 (4.1%)          | 10 (12.8%)              | 16 (6.9%)             | 61 (19.0%)             |
| DD grade I (n=193)    | 76 (5.2%)          | 3 (3.8%)                | 44 (18.9%)            | 70 (21.8%)             |
| DD grade II/III (=59) | 9 (0.62%)          | 1 (1.3%)                | 1 (0.43%)             | 48 (15.0%)             |

Percentages are relative to each PBHS subcategory. ASE, American Society of Echocardiography; DD, diastolic dysfunction; LVDF, left ventricular diastolic function; PBHS, Project Baseline Health Study.
