# Supplementary material
Source: PubMed Central journal article supplement (PMC10870833)
Supplement: NIHMS1954269-supplement-Table_s8.pdf [file NIHMS1954269-supplement-Table_s8.pdf]

**Table S8.** Multivariable-adjusted risk for LV diastolic dysfunction (American Society of Echocardiography recommendations) by CAC score (0 and tertiles).

| CAC group                                 | LV diastolic dysfunction (ASE) |         |                        |         |
|-------------------------------------------|--------------------------------|---------|------------------------|---------|
|                                           | Grade I, II or III (n=252)     |         | Grade II or III (n=59) |         |
|                                           | Odds ratio (5-95%CI)           | P value | Odds ratio (5-95%CI)   | P value |
| <b><i>Unadjusted model</i></b>            |                                |         |                        |         |
| CAC = 0 (n=1251)                          | <i>reference</i>               |         | <i>reference</i>       |         |
| CAC >0 and ≤17.5 (n=277)                  | 2.27 (1.46 to 3.54)            | <0.001  | 1.90 (0.66 to 5.43)    | 0.23    |
| CAC >17.5 and ≤176 (n=277)                | 4.41 (3.01 to 6.46)            | <0.001  | 6.33 (2.96 to 13.5)    | <0.001  |
| CAC >176 (n=277)                          | 9.2 (6.5 to 13.1)              | <0.001  | 10.7 (5.3 to 21.5)     | <0.001  |
| <b><i>Age- and sex-adjusted model</i></b> |                                |         |                        |         |
| CAC = 0 (n=1251)                          | <i>reference</i>               |         | <i>reference</i>       |         |
| CAC >0 and ≤17.5 (n=277)                  | 1.72 (1.09 to 2.71)            | 0.021   | 1.34 (0.45 to 3.95)    | 0.60    |
| CAC >17.5 and ≤176 (n=277)                | 2.36 (1.54 to 3.62)            | <0.001  | 2.79 (1.17 to 6.63)    | 0.020   |
| CAC >176 (n=277)                          | 4.11 (2.67 to 6.34)            | <0.001  | 2.79 (1.17 to 6.63)    | 0.010   |
| <b><i>Fully adjusted model</i></b>        |                                |         |                        |         |
| CAC = 0 (n=1251)                          | <i>reference</i>               |         | <i>reference</i>       |         |
| CAC >0 and ≤17.5 (n=277)                  | 1.32 (0.77 to 2.24)            | 0.31    | 1.19 (0.39 to 3.60)    | 0.76    |
| CAC >17.5 and ≤176 (n=277)                | 1.63 (0.97 to 2.75)            | 0.065   | 2.25 (0.90 to 5.60)    | 0.083   |
| CAC >176 (n=277)                          | 2.10 (1.21 to 3.66)            | 0.009   | 2.03 (0.80 to 5.17)    | 0.14    |

Individuals with CAC >0 were classified based on CAC tertile limits. The fully adjusted model included clinical correlates identified in stepwise logistic regression. ASE, American Society of Echocardiography; CAC, coronary artery calcium; LV, left ventricular.
