# Supplementary material
Source: PubMed Central journal article supplement (PMC10870833)
Supplement: NIHMS1954269-supplement-Table_s9.pdf [file NIHMS1954269-supplement-Table_s9.pdf]

**Table S9.** Multivariable-adjusted risk for LV diastolic dysfunction (American Society of Echocardiography recommendations) by CAC score (0, 0-100, 100-300, and  $\geq 300$ ).

| CAC group                                 | LV diastolic dysfunction (ASE) |         |                        |         |
|-------------------------------------------|--------------------------------|---------|------------------------|---------|
|                                           | Grade I, II or III (n=252)     |         | Grade II or III (n=59) |         |
|                                           | Odds ratio (5-95%CI)           | P value | Odds ratio (5-95%CI)   | P value |
| <b><i>Unadjusted model</i></b>            |                                |         |                        |         |
| CAC = 0 (n=1251)                          | <i>reference</i>               |         | <i>reference</i>       |         |
| CAC >0 and <100 (n=472)                   | 3.03 (2.13 to 4.31)            | <0.001  | 3.16 (1.45 to 6.87)    | 0.004   |
| CAC $\geq 100$ and <300 (n=199)           | 5.61 (3.63 to 8.67)            | <0.001  | 6.88 (2.92 to 16.2)    | <0.001  |
| CAC $\geq 300$ (n=160)                    | 10.5 (7.22 to 15.3)            | <0.001  | 13.5 (6.6 to 27.6)     | <0.001  |
| <b><i>Age- and sex-adjusted model</i></b> |                                |         |                        |         |
| CAC = 0 (n=1251)                          | <i>reference</i>               |         | <i>reference</i>       |         |
| CAC >0 and <100 (n=472)                   | 1.97 (1.34 to 2.87)            | <0.001  | 1.81 (0.78 to 4.19)    | 0.17    |
| CAC $\geq 100$ and <300 (n=199)           | 2.79 (1.72 to 4.53)            | <0.001  | 2.65 (1.01 to 6.98)    | 0.048   |
| CAC $\geq 300$ (n=160)                    | 4.44 (2.80 to 7.04)            | <0.001  | 3.87 (1.58 to 9.50)    | 0.003   |
| <b><i>Fully adjusted model</i></b>        |                                |         |                        |         |
| CAC = 0 (n=1251)                          | <i>reference</i>               |         | <i>reference</i>       |         |
| CAC >0 and <100 (n=472)                   | 1.46 (0.94 to 2.28)            | 0.095   | 1.55 (0.65 to 3.70)    | 0.32    |
| CAC $\geq 100$ and <300 (n=199)           | 1.84 (1.00 to 3.37)            | 0.048   | 2.04 (0.74 to 5.67)    | 0.17    |

CAC  $\geq$ 300 (n=160)

1.91 (1.04 to 3.51)

0.037

2.23 (0.86 to 5.80)

0.10

---

ASE, American Society of Echocardiography; LV, left ventricular.
