# Supplementary material
Source: PubMed Central journal article supplement (PMC10870833)
Supplement: NIHMS1954269-supplement-Table_s10.pdf [file NIHMS1954269-supplement-Table_s10.pdf]

**Extra analysis for age-stratified results**

**Table S10.** Multivariable-adjusted association between LV diastolic function indexes and CAC score.

| CAC group                     | E/A ratio        |         | Septal-lateral e' (cm/s) |         | Septal-lateral E/e' ratio |         | LAVI             |         |
|-------------------------------|------------------|---------|--------------------------|---------|---------------------------|---------|------------------|---------|
|                               | Effect size ± SE | P value | Effect size ± SE         | P value | Effect size ± SE          | P value | Effect size ± SE | P value |
| <i>Age &lt;50 years</i>       |                  |         |                          |         |                           |         |                  |         |
| CAC = 0 (n=842)               | <i>reference</i> |         | <i>reference</i>         |         | <i>reference</i>          |         | <i>reference</i> |         |
| CAC >0 and ≤2.17 (n=56)       | -0.036±0.038     | 0.35    | -0.26±0.18               | 0.15    | 0.054±0.14                | 0.71    | -0.78±0.55       | 0.16    |
| CAC >2.17 and ≤14.1 (n=56)    | 0.074±0.12       | 0.52    | 0.12±0.53                | 0.83    | 0.029±0.42                | 0.95    | 1.02±1.76        | 0.56    |
| CAC >14.1 (n=56)              | -0.17±0.17       | 0.30    | -0.49±0.79               | 0.54    | -0.34±0.63                | 0.58    | -0.84±2.51       | 0.74    |
| <i>Age ≥50 years</i>          |                  |         |                          |         |                           |         |                  |         |
| CAC = 0 (n=409)               | <i>reference</i> |         | <i>reference</i>         |         | <i>reference</i>          |         | <i>reference</i> |         |
| CAC >0 and ≤39.9 (n=221)      | -0.020±0.027     | 0.46    | -0.43±0.12               | 0.001   | 0.54±0.19                 | 0.004   | -0.65±0.57       | 0.26    |
| CAC >39.9 and ≤249<br>(n=221) | 0.037±0.036      | 0.30    | -0.30±0.16               | 0.063   | 0.58±0.25                 | 0.020   | 0.26±0.76        | 0.73    |
| CAC >249 (n=221)              | -0.020±0.036     | 0.58    | -0.73±0.16               | <0.001  | 1.21±0.25                 | <0.001  | 0.36±0.75        | 0.64    |

The subgrouping of individuals with CAC > 0 was based on CAC tertile limits. Effect sizes were adjusted for clinical correlates identified in stepwise linear regression, including age and age<sup>2</sup> (Table 2). CAC, coronary artery calcium; LAVI, left atrial volume index; SE, standard error.
