# Supplementary material
Source: PubMed Central journal article supplement (PMC10870833)
Supplement: NIHMS1954269-supplement-Table_s11.pdf [file NIHMS1954269-supplement-Table_s11.pdf]

**Table S11.** Multivariable-adjusted risk for LV diastolic dysfunction (Project Baseline Health Study definition) by CAC score (0 and tertiles) among age groups. In individuals below 50 years of age, 105 (10.4%) and 31 (3.1%) presented with LVDD grade I and II, respectively. In individuals over 50 years of age, 128 (11.9%) and 290 (27.1%) presented with LVDD grade I and II, respectively.

| <i>CAC group</i>                 | <b>LV diastolic dysfunction (PBHS)</b> |                       |                             |                       |
|----------------------------------|----------------------------------------|-----------------------|-----------------------------|-----------------------|
|                                  | <b>Grade II</b>                        |                       | <b>Grade I and II</b>       |                       |
|                                  | <b>Odds ratio (5-95%CI)</b>            | <b><i>P value</i></b> | <b>Odds ratio (5-95%CI)</b> | <b><i>P value</i></b> |
| <b>Age &lt;50 years (n=1010)</b> |                                        |                       |                             |                       |
| <i>Unadjusted model</i>          |                                        |                       |                             |                       |
| CAC = 0 (n=842)                  | <i>reference</i>                       |                       | <i>reference</i>            |                       |
| CAC >0 and ≤2.17 (n=56)          | 2.33 (0.67 to 8.08)                    | 0.18                  | 2.30 (1.19 to 4.42)         | 0.013                 |
| CAC >2.17 and ≤14.1 (n=56)       | 3.16 (1.04 to 9.59)                    | 0.042                 | 2.07 (1.06 to 4.05)         | 0.034                 |
| CAC >14.1 (n=56)                 | 3.16 (1.04 to 9.59)                    | 0.042                 | 2.30 (1.19 to 4.42)         | 0.013                 |
| <i>Fully-adjusted model</i>      |                                        |                       |                             |                       |
| CAC = 0 (n=842)                  | <i>reference</i>                       |                       | <i>reference</i>            |                       |
| CAC >0 and ≤2.17 (n=56)          | 3.02 (0.74 to 12.4)                    | 0.13                  | 1.50 (0.72 to 3.12)         | 0.28                  |
| CAC >2.17 and ≤14.1 (n=56)       | 1.62 (0.44 to 5.95)                    | 0.47                  | 1.03 (0.47 to 2.23)         | 0.95                  |
| CAC >14.1 (n=56)                 | 0.66 (0.16 to 2.76)                    | 0.57                  | 0.97 (0.44 to 2.12)         | 0.92                  |
| <b>Age ≥50 years (n=1072)</b>    |                                        |                       |                             |                       |
| <i>Unadjusted model</i>          |                                        |                       |                             |                       |
| CAC = 0 (n=409)                  | <i>reference</i>                       |                       | <i>reference</i>            |                       |

|                             |                     |        |                     |        |
|-----------------------------|---------------------|--------|---------------------|--------|
| CAC >0 and ≤39.9 (n=221)    | 2.35 (1.59 to 3.47) | <0.001 | 2.21 (1.56 to 3.13) | <0.001 |
| CAC >39.9 and ≤249 (n=221)  | 1.80 (1.20 to 2.69) | 0.004  | 1.70 (1.19 to 2.41) | 0.003  |
| CAC >249 (n=221)            | 4.45 (3.06 to 6.48) | <0.001 | 4.88 (3.43 to 6.93) | <0.001 |
| <i>Fully-adjusted model</i> |                     |        |                     |        |
| CAC = 0 (n=409)             | <i>reference</i>    |        | <i>reference</i>    |        |
| CAC >0 and ≤39.9 (n=221)    | 2.38 (1.55 to 3.68) | <0.001 | 2.06 (1.40 to 3.03) | <0.001 |
| CAC >39.9 and ≤249 (n=221)  | 1.63 (1.03 to 2.58) | 0.036  | 1.46 (0.97 to 2.18) | 0.068  |
| CAC >249 (n=221)            | 3.71 (2.33 to 5.92) | <0.001 | 3.69 (2.39 to 5.69) | <0.001 |

---

Individuals with CAC >0 were classified based on CAC tertile limits. The fully adjusted model included clinical correlates identified in a stepwise logistic regression, including age and age<sup>2</sup>. CAC, coronary artery calcium; LV, left ventricular; PBHS, Project Baseline Health Study.
